# Supplementary material for: Quasi-solid Composite Electrolytes of Poly-(Dioxolane) & Garnet LLZO Nanofibers Enable High Energy Efficiency Lithium-Metal Batteries
Source: Preprints.org preprint supplement (doi:10.20944/preprints202404.0808.v1), 2024-04-11
Supplement: Supplementary file 1 [file supplementary]

Supporting information

Article

Quasi-Solid Composite Electrolytes of Poly-(Dioxolane) & Garnet LLZO Nanofibers Enable High Energy Efficiency Lithium-Metal Batteries

Zhengqiang Li 1 and Dr David Salem 1,2,3,4

1 Department of Nanoscience and Nanoengineering (NANO), South Dakota School of Mines and Technology, Rapid City, SD 57701, USA

2 Composites and Polymer Engineering Laboratory (CAPE), South Dakota School of Mines and Technology, Rapid City, SD 57701, USA

3 Materials and Metallurgical Engineering (MET), South Dakota School of Mines and Technology, Rapid City, SD 57701, USA

4 Karen M. Swindler Department of Chemical and Biological Engineering, South Dakota School of Mines and Technology, Rapid City, SD 57701, USA

Content

1. Figure **S1** G0 (1M-LiFSI PDOL) IR spectrum;
2. Figure **S2** IR spectrum of PDOL with 1 M LiFSI, 2M LiFSI and 3.5 M LiFSI;
3. Figure **S3** Optical images of As-spun electro-spun nanofibers and c-LLZO nanofibers;
4. Figure **S4** SEM of G5 composite electrolyte (5 % c-LLZO in 1M LiFSI-PDOL);
5. Figure **S5** One -S-F asymmetric vibration mode in HFSI molecules at 733 cm-1, calculated with DFT- B3LYP/6-311++G(d,p) basis set using Gaussain 09W;
6. Figure **S6** Infrared spectra of composite electrolytes G0, G1, G5 and G10;
7. Figure **S7** The optical images of G0, G1, G5 and G10 samples in air before and after 80 oC overnight-heating.
8. Figure **S8** Optical images of composite electrolytes G0, G1, G5 and G10 before and after 80 oC overnight heating in air.
9. Figure **S9** The conductivity of G0, G1, G5 and G10 at 25 oC
10. Figure **S10** One -SO2- asymmetric vibration mode in HFSI molecules at 1187 cm-1, calculated with DFT- B3LYP/6-311++G(d,p) basis set;
11. Figure **S11** One -SO2- symmetric vibration mode in HFSI molecules at 1465 cm-1, calculated with DFT- B3LYP/6-311++G(d,p) basis set
12. Figure **S12** One -SO2- symmetric vibration mode in HFSI molecules at 1466 cm-1
13. Figure **S13** One -S-N-S- asymmetric vibration mode in HFSI molecules at 838 cm-1
14. Figure **S14** IR spectrum of HFSI molecules, calculated with DFT- B3LYP/6-311++G(d,p) basis set using Gaussian 09W;
15. Figure **S15** Chemical structure of HFSI and LiFSI;
16. Figure **S16** I-t curve of Li/G5/Li 10 mV polarization (1) and Nyquist plots of Li/G5/Li symmetric cells before and after polarization. Li-ion transference number calculated to be 61.5% based on tLi+1=Is/Io.

**Figure S1** InfraRed spectra of DOL-monomer and PDOL with LiFSI (G0) (Enlarged Figure 1d)


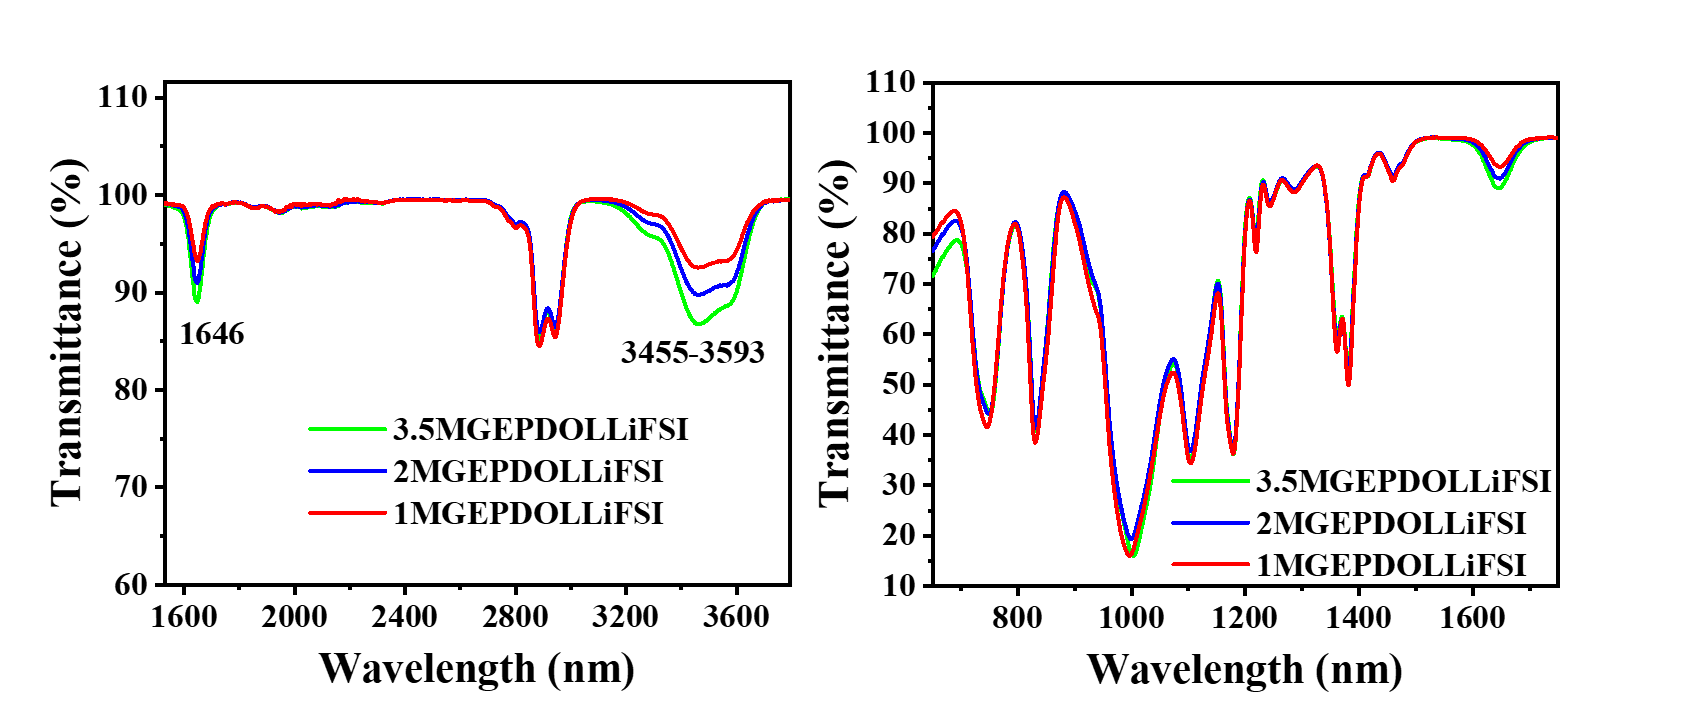


**Figure S2** InfraRed spectra of PDOL initiated with 1 M, 2 M and 3.5 M LiFSI.


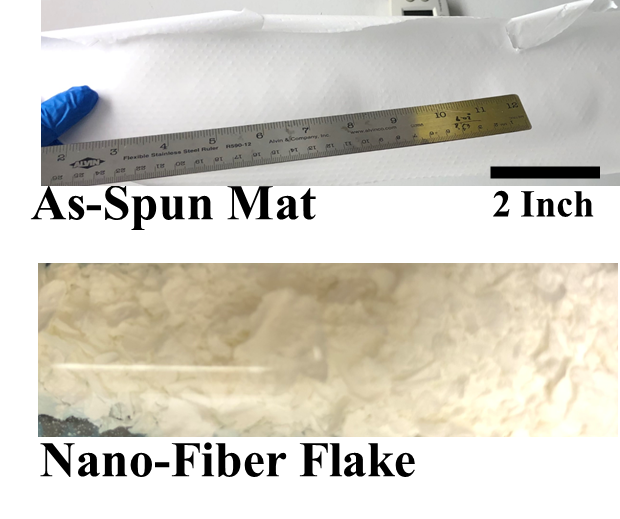


Figure **S3** Optical image of as-spun precursor mat over 20 inch2 large and after-sintered c-LLZO nanofibers in one vial.


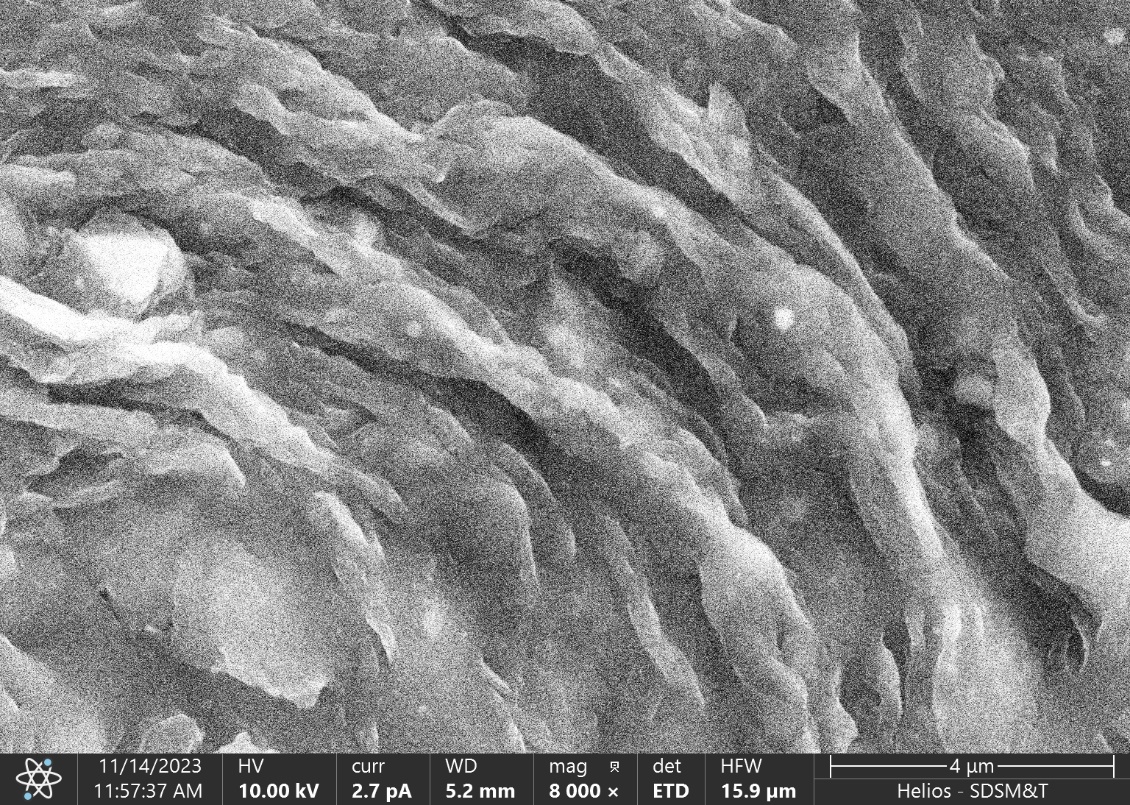


**4 µm**

Figure **S4** SEM of G5 composite electrolyte (5 % c-LLZO in 1M LiFSI-PDOL)


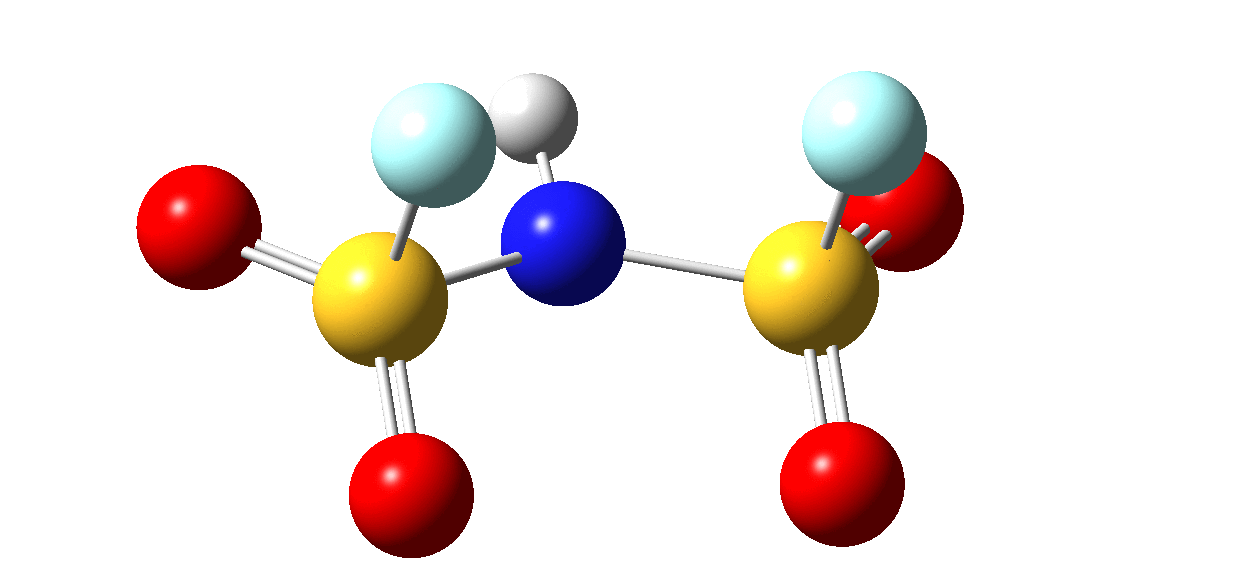


Figure **S5** One -S-F asymmetric vibration mode in HFSI molecules at 733 cm-1, showing one -S-F group (Pale-Blue-balls: fluorine atoms ; yellow-balls: sulfur atoms) stretching while the other one contraction, calculated with DFT- B3LYP/6-311++G(d,p) basis set.

Figure **S6** Infrared spectra of composite electrolytes of G0, G1, G5 and G10


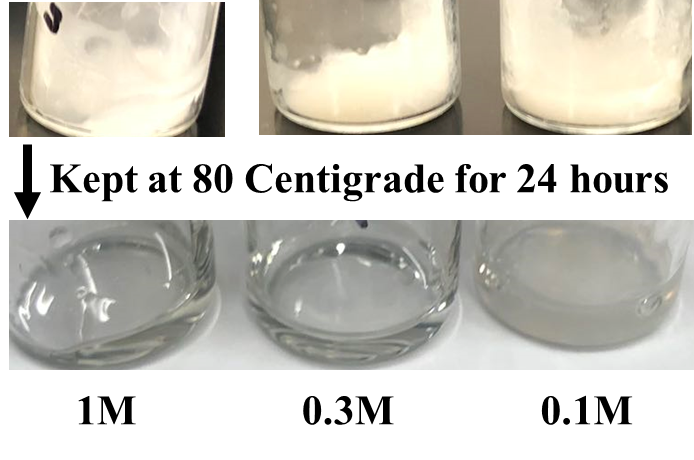


Figure **S7** The optical images of G0, G1, G5 and G10 samples in air before and after 80 oC overnight-heating.


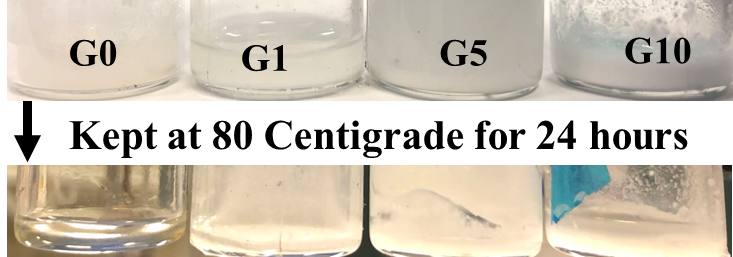


Figure **S8** Optical images of composite electrolytes G0, G1, G5 and G10 80 oC overnight heating in air.


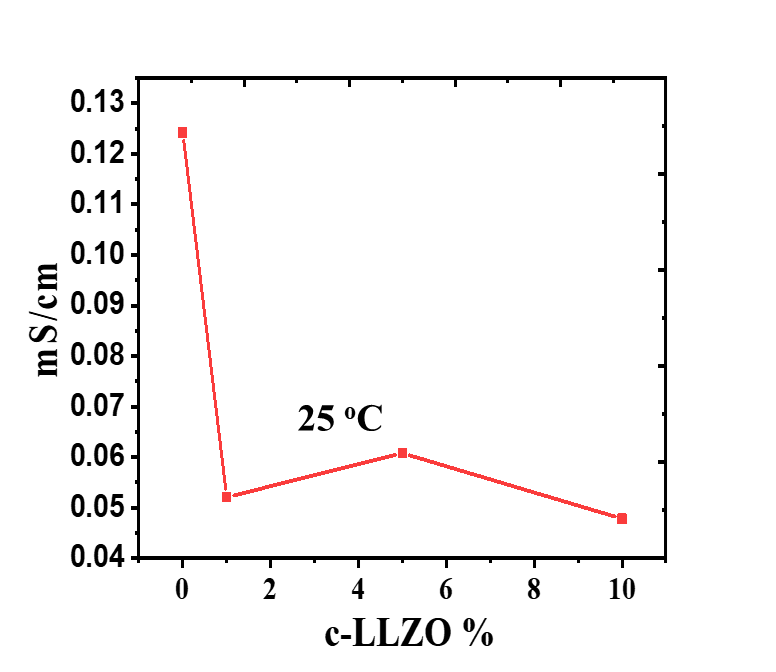


Figure **S9** The conductivity of G0, G1, G5 and G10 at 25 oC


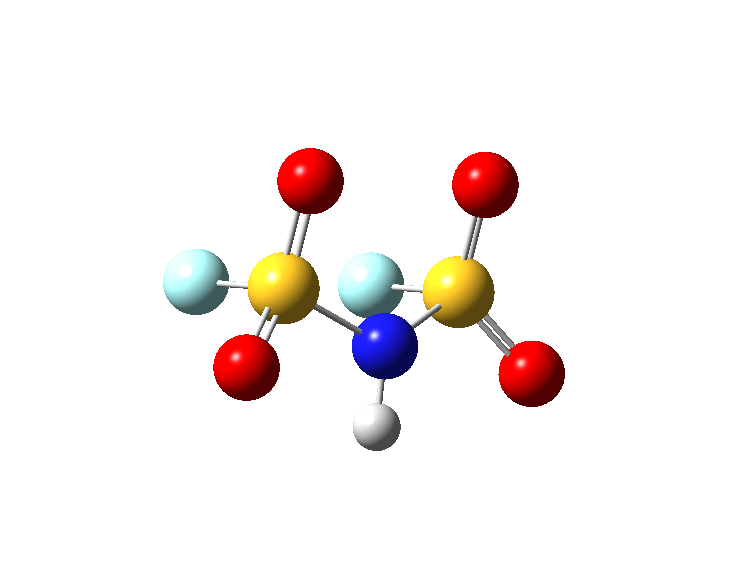


Figure **S10** One -SO2- asymmetric vibration mode in HFSI molecules at 1187 cm-1, showing one -SO2- group (Red-balls: oxygen atoms; yellow-balls: sulfur atoms) stretching while the other one contraction, calculated with DFT- B3LYP/6-311++G(d,p) basis set.


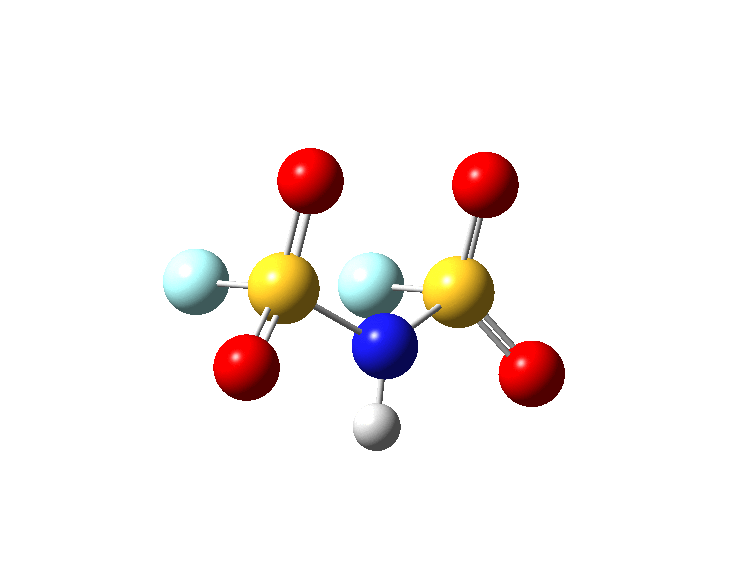


Figure **S11** One -SO2- symmetric vibration mode in HFSI molecules at 1465 cm-1(Red-ball: oxygen; yellow-ball: sulfur; Blue ball: Nitrogen;), calculated with DFT- B3LYP/6-311++G(d,p) basis set.


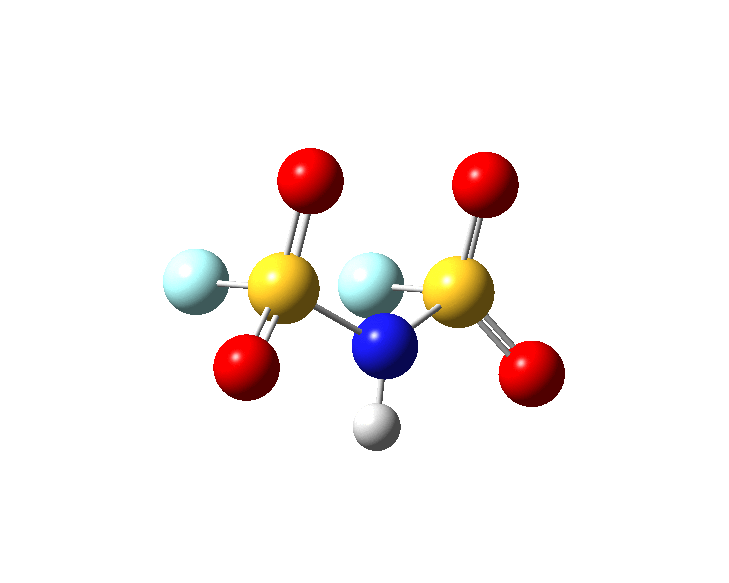


Figure **S12** One -SO2- symmetric vibration mode in HFSI molecules at 1466 cm-1 (Red-ball: oxygen; yellow-ball: sulfur; Blue: Nitrogen; White:Hydrogen), calculated with DFT- B3LYP/6-311++G(d,p) basis set.


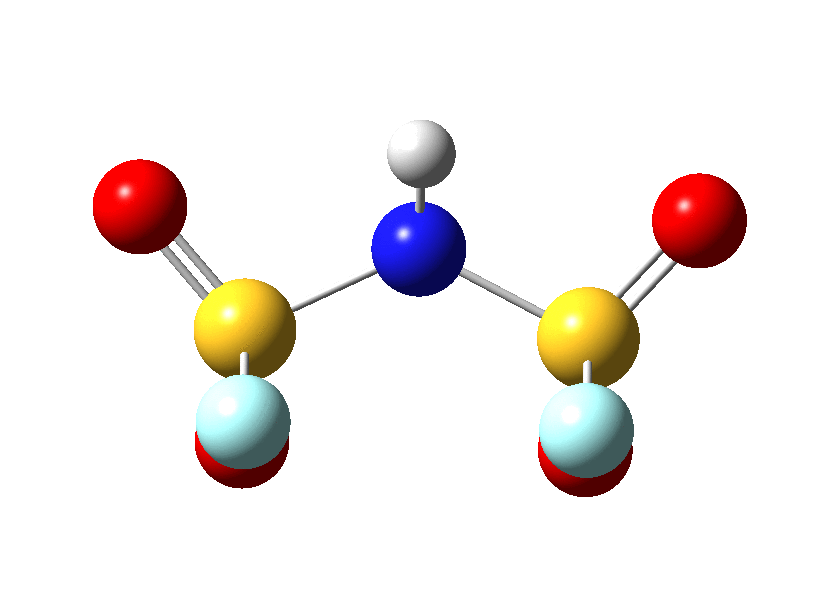


Figure **S13** One -S-N-S- asymmetric vibration mode in HFSI molecules at 838 cm-1(Red-ball: oxygen; yellow-ball: sulfur; Blue: Nitrogen; White: Hydrogen), calculated with DFT- B3LYP/6-311++G(d,p) basis set.


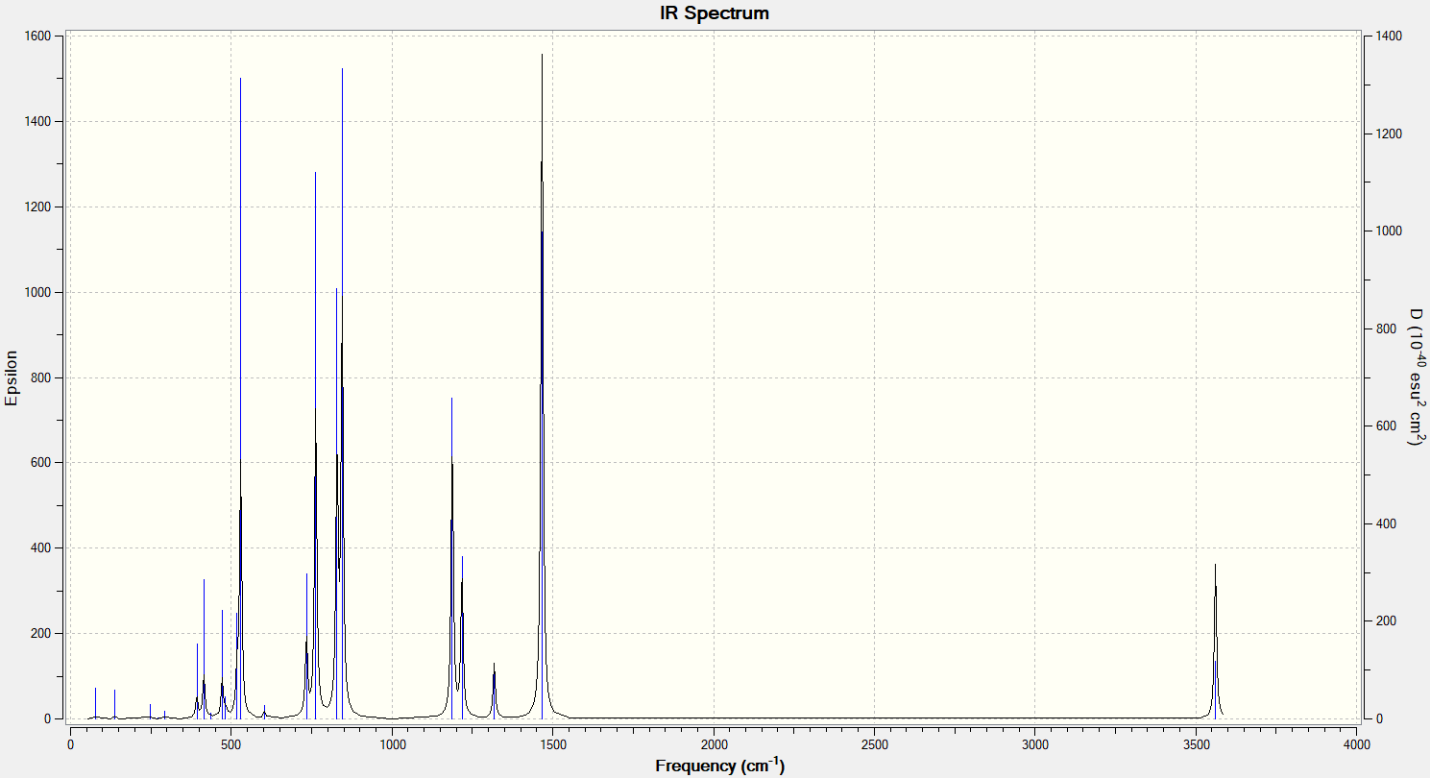
 Figure **S14** Stimulated IR spectrum of HFSI molecules, calculated with DFT-B3LYP/6-311++G(d,p) basis set.

Figure **S15** Chemical structure of HFSI and LiFSI molecules.


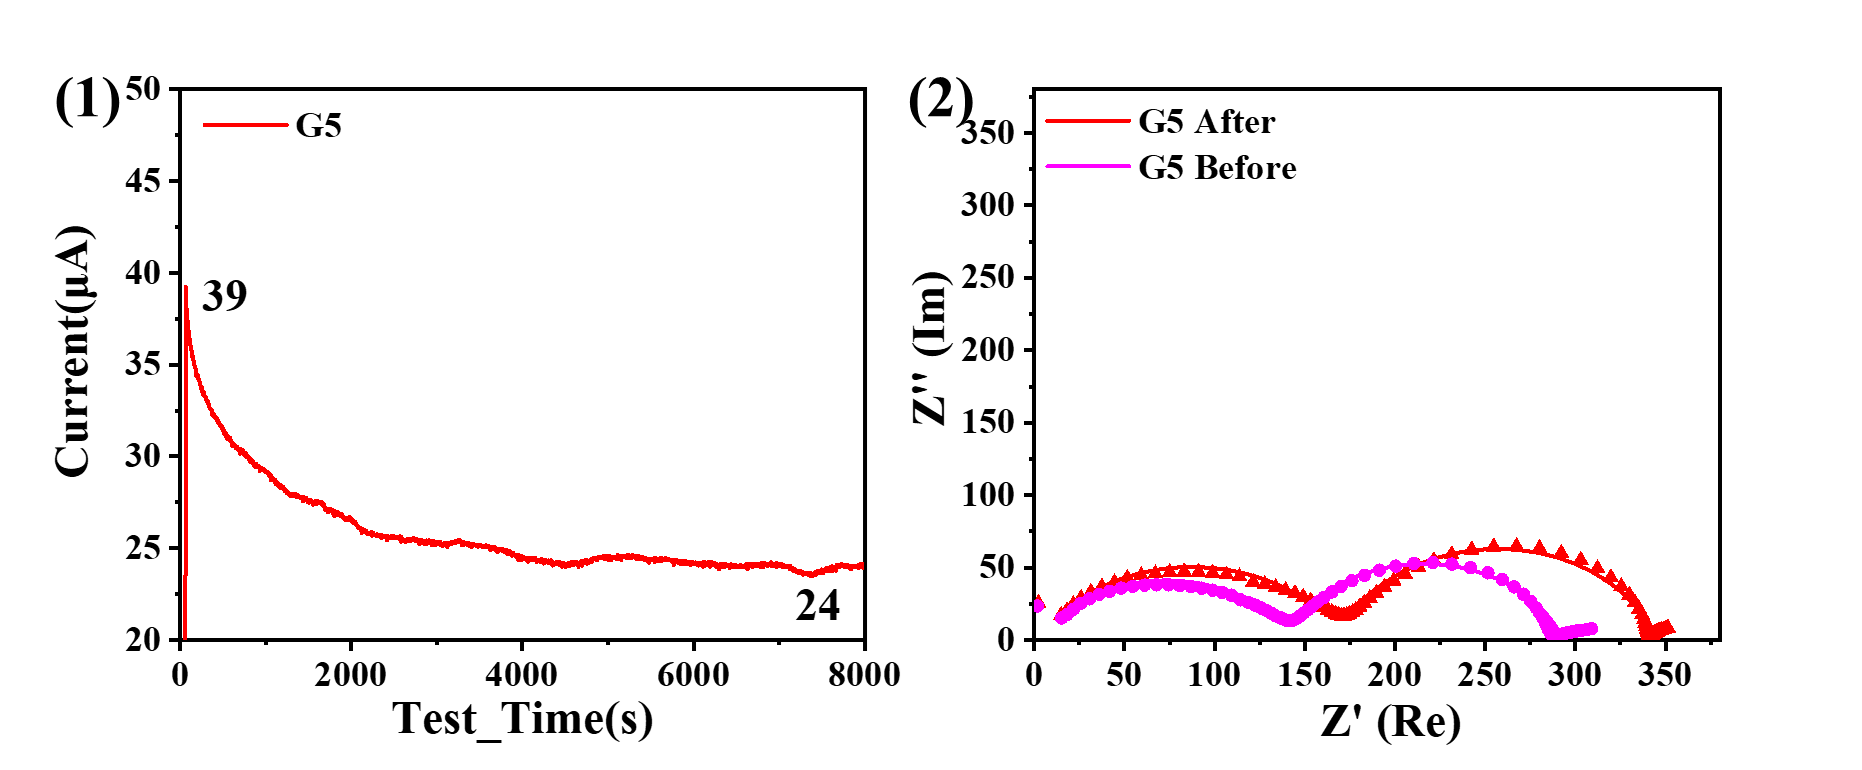


Figure **S16** Current-time curve of Li/G5/Li 10 mV polarization (1) and Nyquist plots of Li/G5/Li before and after polarization. Li-ion transference number calculated to be 61.5% based on tLi+1=Is/Io.
